# Supplementary material
Source: PubMed Central journal article supplement (PMC6585484)
Supplement: AEM.02638-18-s0001.pdf [file AEM.02638-18-s0001.pdf]

*Applied and Environmental Microbiology*

*Supplemental material for:*

Spatial-temporal pattern of sulfate-dependent anaerobic methane oxidation  
in an intertidal zone of the East China Sea

Jiaqi Wang<sup>1</sup>, Miaolian Hua<sup>1</sup>, Chaoyang Cai<sup>1</sup>, Jiajie Hu<sup>1</sup>, Junren Wang<sup>1</sup>, Hongrui Yang<sup>1</sup>,  
Fang Ma<sup>2\*</sup>, Haifeng Qian<sup>3</sup>, Ping Zheng<sup>1</sup>, Baolan Hu<sup>1,4\*</sup>

1. Department of Environmental Engineering, Zhejiang University, Hangzhou 310058,  
China

2. State Key Laboratory of Urban Water Resource and Environment, Harbin Institute  
of Technology, Harbin 150090, China

3. College of Environment, Zhejiang University of Technology, Hangzhou 310032,  
China

4. Zhejiang Province Key Laboratory for Water Pollution Control and Environmental  
Safety, Hangzhou 310058, China

**\*For correspondence**

Baolan Hu

Department of Environmental Engineering,

Zhejiang University

Hangzhou, 310058, China

Tel.: 0086 0571 88982340

Fax: 0086 0571 88982340

E-mail: blhu@zju.edu.cn

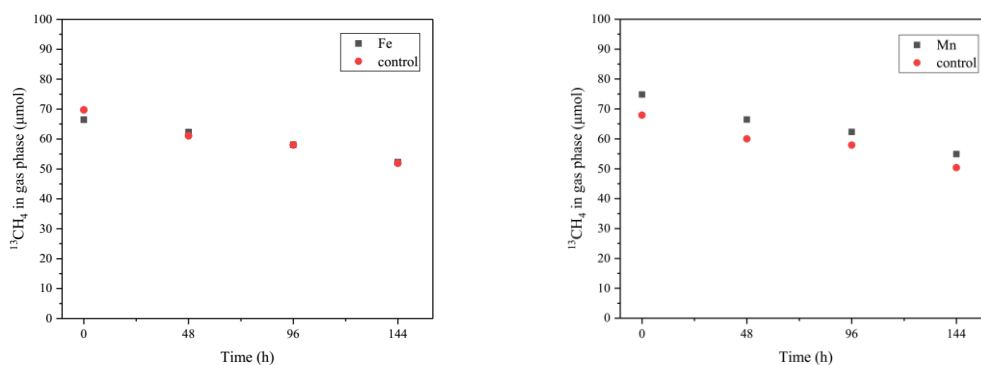

Fig. S1  $^{13}\text{CH}_4$  consumption in incubation of iron- and manganese-dependent anaerobic methane oxidation. Control represents the group in which only  $^{13}\text{CH}_4$  was added.

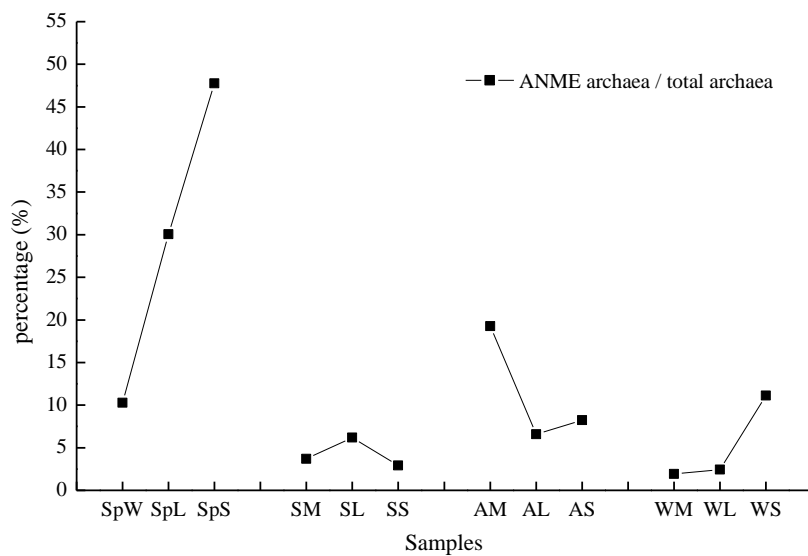

Fig. S2 The ratio of ANME archaea to total archaea measured by quantitative PCR in sediments collected from Zhoushan Archipelago intertidal zone

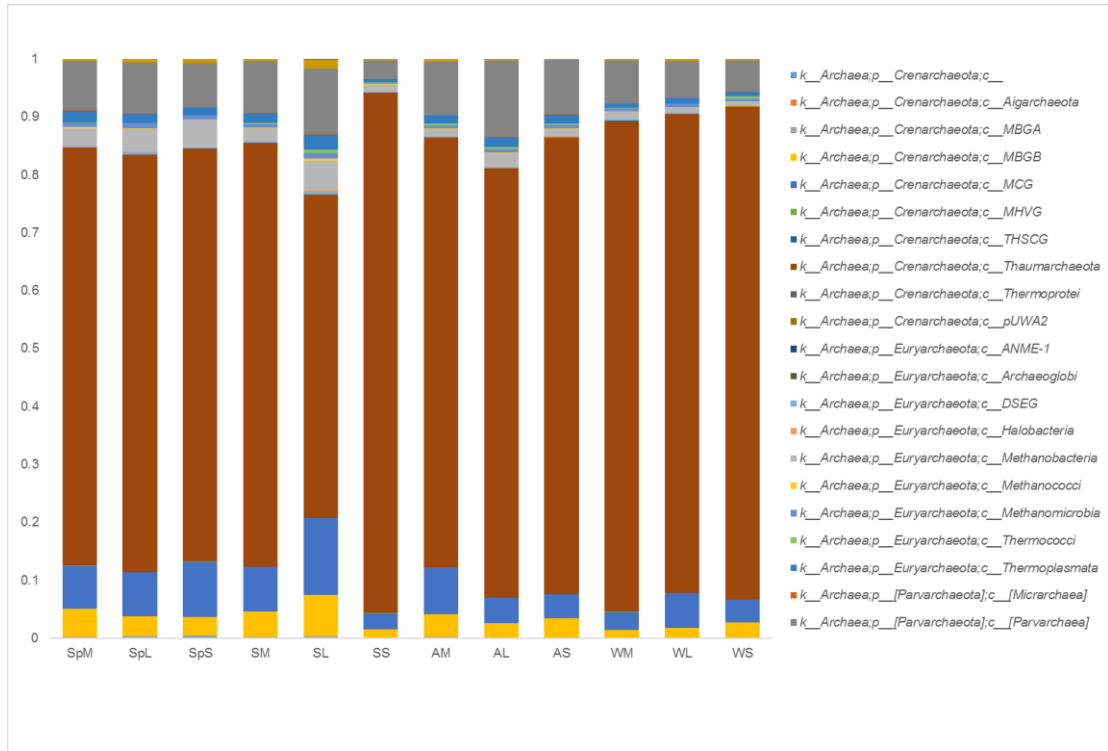

Fig. S3 The relative abundance of total archaea at class level in sediments collected from Zhoushan Archipelago intertidal zone

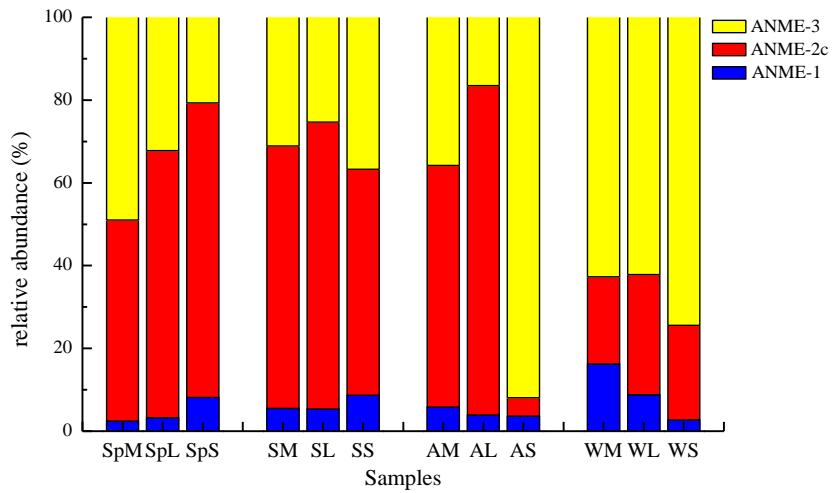

Fig. S4 The community structure of ANME archaea detected by quantitative PCR in sediments collected from the intertidal zone of Zhoushan Archipelago

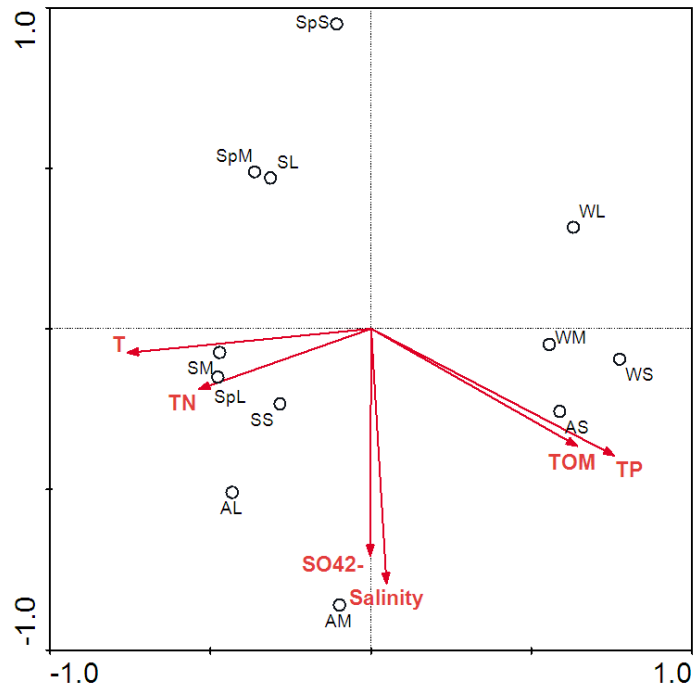

Fig. S5 RDA analysis of the correlations between ANME archaea community structures and environmental factors in sediments collected from Zhoushan Archipelago intertidal zone

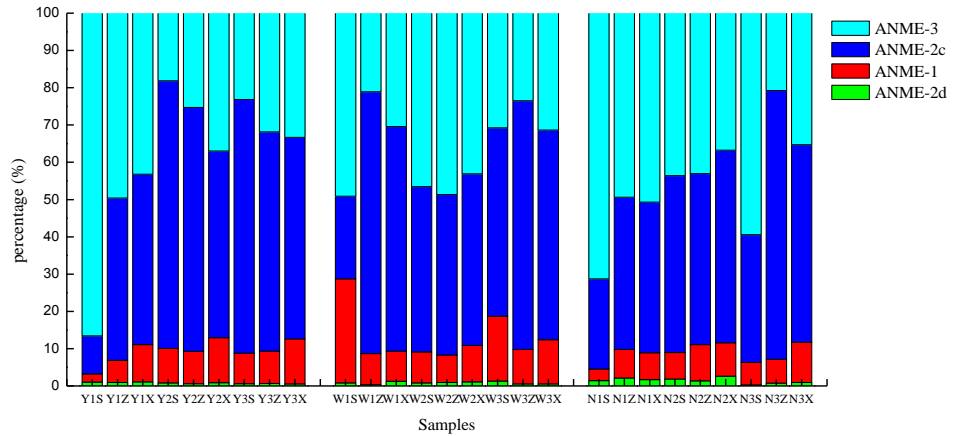

Fig. S6 The community structure of anaerobic methane oxidation archaea detected by quantitative PCR in the samples collected from three simulated columns

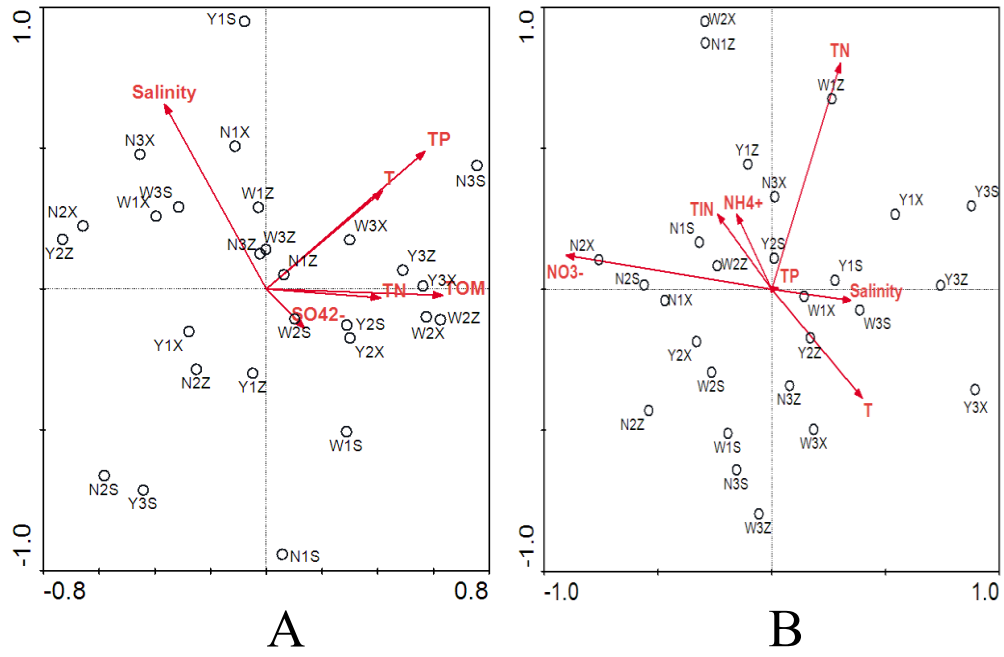

Fig. S7 RDA analysis to show the correlations between ANME archaea or ANME-2d archaea community structures and environmental factors in simulated columns

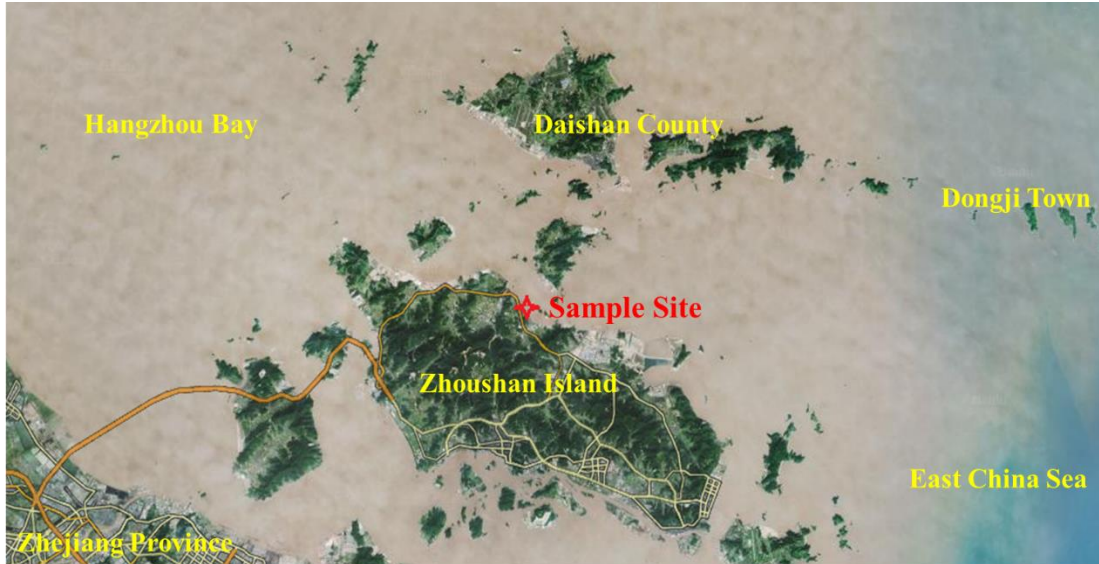

Fig. S8 Map of the sampling sites within Zhoushan Archipelago

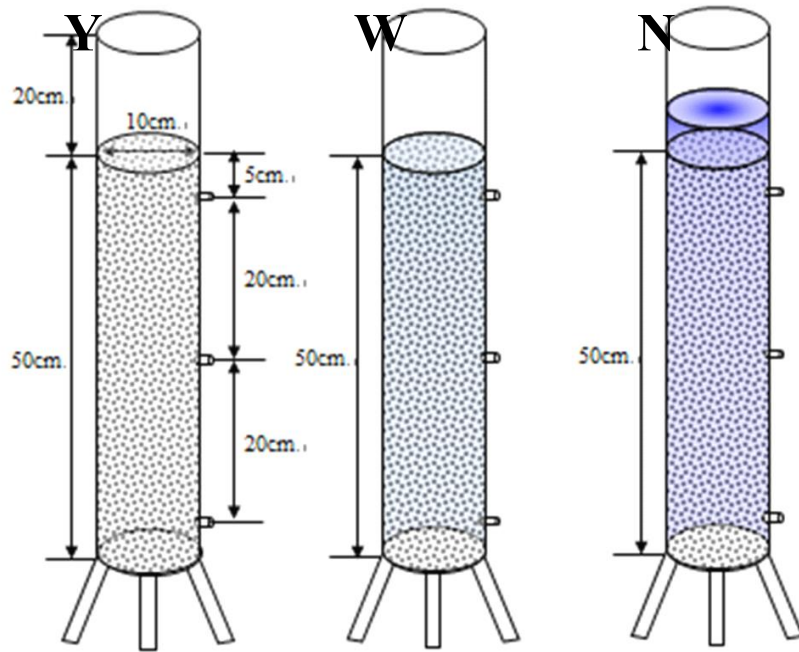

Fig. S9 Three simulated columns used in this study

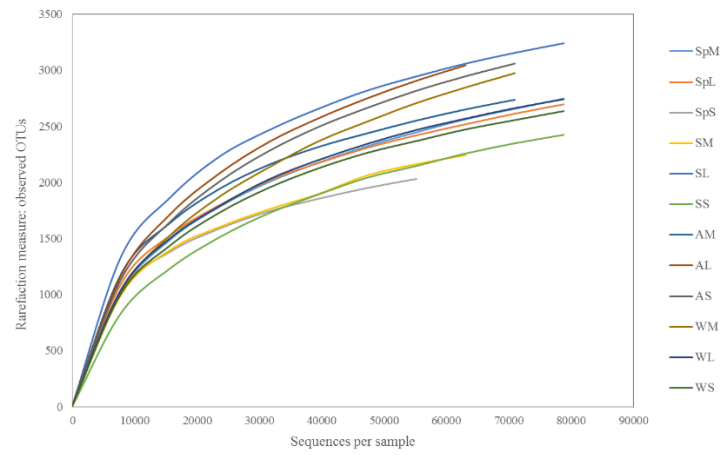

Fig. S10 Rarefaction curves of the number of observed OTUs from 16S rRNA sequencing

Table S1 Correlation analysis of environmental factors and the abundance of ANME archaea and potential S-AOM activity in sediments collected from Zhoushan Archipelago intertidal zone

| Environment<br>Factors        | Pearson correlation coefficients |                      |                     |                                |                      |                   |                   |
|-------------------------------|----------------------------------|----------------------|---------------------|--------------------------------|----------------------|-------------------|-------------------|
|                               | ANME-1<br>abundance              | ANME-2c<br>abundance | ANME-3<br>abundance | <i>M. oxyfera</i><br>abundance | ANME-2d<br>abundance | S-AOM<br>activity | D-AOM<br>activity |
| T                             | <b>0.555**</b>                   | <b>0.504**</b>       | -0.132              | -0.124                         | <b>0.308**</b>       | <b>0.405*</b>     | <b>0.309*</b>     |
| ORP                           | 0.389                            | 0.456                | -0.189              | -0.123                         | 0.006                | 0.456             | 0.398             |
| SO <sub>4</sub> <sup>2-</sup> | <b>0.433*</b>                    | 0.359                | 0.113               | -0.045                         | -0.098               | 0.589             | 0.667             |
| NH <sub>4</sub> <sup>+</sup>  | 0.017                            | -0.060               | -0.039              | -0.045                         | -0.098               | -0.009            | -0.129            |
| NO <sub>3</sub> <sup>-</sup>  | <b>0.462*</b>                    | 0.336                | 0.332               | <b>0.428*</b>                  | <b>0.629**</b>       | -0.359            | <b>0.785**</b>    |
| TIN                           | 0.067                            | -0.022               | -0.005              | 0.003                          | 0.279                | -0.012            | -0.223            |
| TP                            | <b>0.412*</b>                    | 0.160                | -0.114              | -0.036                         | -0.199               | 0.122             | -0.111            |
| Salinity                      | 0.062                            | 0.111                | 0.137               | 0.036                          | -0.105               | 0.109             | 0.291             |
| TN                            | <b>-0.459**</b>                  | -0.296               | -0.178              | -0.047                         | -0.048               | 0.349             | 0.219             |
| TOM                           | <b>0.660**</b>                   | <b>0.524**</b>       | 0.004               | 0.048                          | 0.049                | <b>0.578**</b>    | <b>0.346**</b>    |

\*denotes  $p < 0.05$ , \*\*denotes  $p < 0.01$

Table S2 The diversity of ANME archaea in sediments collected from Zhoushan Archipelago intertidal zone

| Sample | Sequence number | Coverage (%) | OTUs number | Shannon index | Chao 1 index |
|--------|-----------------|--------------|-------------|---------------|--------------|
| SpM    | 1430            | 96.7         | 46          | 3.09          | 104.20       |
| SpL    | 1413            | 95.2         | 52          | 4.09          | 130.88       |
| SpS    | 1546            | 98.3         | 39          | 3.15          | 106.78       |
| SM     | 1620            | 92.1         | 42          | 2.89          | 95.37        |
| SL     | 895             | 91.5         | 59          | 4.12          | 148.32       |
| SS     | 1170            | 92.6         | 53          | 3.14          | 106.76       |
| AM     | 886             | 95.0         | 44          | 2.77          | 96.95        |
| AL     | 1592            | 96.3         | 70          | 3.98          | 143.28       |
| AS     | 1500            | 97.1         | 61          | 4.00          | 134.80       |
| WM     | 1670            | 93.2         | 50          | 4.23          | 143.397      |
| WL     | 1283            | 96.3         | 63          | 4.35          | 160.95       |
| WS     | 1633            | 97.5         | 49          | 2.98          | 101.32       |

The coverage was calculated as  $C = [1 - (n_1/N)] \times 100$ , where  $n_1$  is the number of unique OTUs and  $N$  is the total number of sequences in the sample.

Table S3 Correlation analysis of environmental factors and the diversity of ANME archaea in sediments collected from Zhoushan Archipelago intertidal zone

| Environmental Factors         | Pearson correlation coefficient |               |               |
|-------------------------------|---------------------------------|---------------|---------------|
|                               | OUTs number                     | Shannon index | Chao1 index   |
| T                             | -0.095                          | -0.321        | -0.313        |
| SO <sub>4</sub> <sup>2-</sup> | <b>0.130**</b>                  | <b>0.193*</b> | 0.0054        |
| TP                            | 0.286                           | 0.226         | 0.269         |
| Salt                          | 0.313                           | -0.185        | -0.108        |
| TN                            | -0.287                          | -0.299        | -0.261        |
| TOM                           | <b>0.355**</b>                  | 0.515         | <b>0.576*</b> |

\*denotes  $p < 0.05$ , \*\*denotes  $p < 0.01$



Table S4 The potential methane oxidation activity and the contribution rate to potential total methane oxidation in the sediments collected from the simulated columns

| Sample | Potential AMO rate (nmol g <sup>-1</sup> (dry sediment) day <sup>-1</sup> ) | AMO contribution rate (%) | Potential D-AOM rate(nmol g <sup>-1</sup> (dry sediment) day <sup>-1</sup> ) | D-AOM contribution rate (%) | Potential S-AOM rate(nmol g <sup>-1</sup> (dry sediment) day <sup>-1</sup> ) | S-AOM contribution rate (%) |
|--------|-----------------------------------------------------------------------------|---------------------------|------------------------------------------------------------------------------|-----------------------------|------------------------------------------------------------------------------|-----------------------------|
| Y1S    | 18.53                                                                       | 98.22%                    | 0.34                                                                         | 1.78%                       | 0.00                                                                         | 0.00%                       |
| Y1Z    | 8.17                                                                        | 93.52%                    | 0.37                                                                         | 4.19%                       | 0.20                                                                         | 2.29%                       |
| Y1X    | 5.10                                                                        | 76.69%                    | 0.91                                                                         | 13.69%                      | 0.64                                                                         | 9.62%                       |
| Y2S    | 24.09                                                                       | 98.83%                    | 0.29                                                                         | 1.17%                       | 0.00                                                                         | 0.00%                       |
| Y2Z    | 20.00                                                                       | 95.83%                    | 0.52                                                                         | 2.49%                       | 0.35                                                                         | 1.68%                       |
| Y2X    | 16.01                                                                       | 87.01%                    | 1.61                                                                         | 8.75%                       | 0.78                                                                         | 4.24%                       |
| Y3S    | 30.19                                                                       | 98.75%                    | 0.38                                                                         | 1.25%                       | 0.00                                                                         | 0.00%                       |
| Y3Z    | 26.00                                                                       | 96.61%                    | 0.51                                                                         | 1.90%                       | 0.40                                                                         | 1.49%                       |
| Y3X    | 20.25                                                                       | 88.47%                    | 1.80                                                                         | 7.86%                       | 0.84                                                                         | 3.67%                       |
| W1S    | 14.83                                                                       | 92.03%                    | 1.03                                                                         | 6.38%                       | 0.26                                                                         | 1.59%                       |
| W1Z    | 7.32                                                                        | 82.66%                    | 1.11                                                                         | 12.55%                      | 0.42                                                                         | 4.80%                       |
| W1X    | 2.55                                                                        | 54.24%                    | 1.41                                                                         | 29.90%                      | 0.75                                                                         | 15.86%                      |
| W2S    | 19.85                                                                       | 92.49%                    | 1.19                                                                         | 5.54%                       | 0.42                                                                         | 1.97%                       |
| W2Z    | 14.84                                                                       | 86.64%                    | 1.53                                                                         | 8.95%                       | 0.75                                                                         | 4.41%                       |
| W2X    | 12.52                                                                       | 80.92%                    | 1.99                                                                         | 12.84%                      | 0.97                                                                         | 6.24%                       |
| W3S    | 25.36                                                                       | 92.96%                    | 1.47                                                                         | 5.39%                       | 0.45                                                                         | 1.65%                       |
| W3Z    | 18.75                                                                       | 87.16%                    | 1.91                                                                         | 8.89%                       | 0.85                                                                         | 3.95%                       |
| W3X    | 15.78                                                                       | 82.16%                    | 2.34                                                                         | 12.17%                      | 1.09                                                                         | 5.67%                       |
| N1S    | 11.63                                                                       | 86.80%                    | 0.97                                                                         | 7.23%                       | 0.80                                                                         | 5.97%                       |
| N1Z    | 7.04                                                                        | 69.55%                    | 1.48                                                                         | 14.65%                      | 1.60                                                                         | 15.80%                      |
| N1X    | 0.36                                                                        | 7.56%                     | 2.09                                                                         | 43.34%                      | 2.37                                                                         | 49.10%                      |
| N2S    | 17.91                                                                       | 89.91%                    | 1.25                                                                         | 6.27%                       | 0.76                                                                         | 3.82%                       |
| N2Z    | 11.21                                                                       | 75.26%                    | 2.01                                                                         | 13.53%                      | 1.67                                                                         | 11.21%                      |
| N2X    | 3.54                                                                        | 43.00%                    | 2.57                                                                         | 31.25%                      | 2.12                                                                         | 25.75%                      |
| N3S    | 22.27                                                                       | 89.58%                    | 1.70                                                                         | 6.84%                       | 0.89                                                                         | 3.58%                       |
| N3Z    | 15.36                                                                       | 78.53%                    | 2.51                                                                         | 12.83%                      | 1.69                                                                         | 8.64%                       |
| N3X    | 5.63                                                                        | 49.13%                    | 3.05                                                                         | 26.61%                      | 2.78                                                                         | 24.26%                      |

AMO, aerobic methane oxidation.

Table S5 Correlation analyses of environmental factors and the abundance of ANME archaea and D-AOM microorganism in the sediments collected from the simulated columns

| Environmental Factors         | Pearson correlation coefficient |                   |                  |                             |                   |                |                      |
|-------------------------------|---------------------------------|-------------------|------------------|-----------------------------|-------------------|----------------|----------------------|
|                               | ANME-1 abundance                | ANME-2c abundance | ANME-3 abundance | <i>M. oxyfera</i> abundance | ANME-2d abundance | S-AOM activity | Nitrate-AOM activity |
| T                             | <b>0.555**</b>                  | <b>0.504**</b>    | -0.132           | -0.124                      | <b>0.308**</b>    | <b>0.405*</b>  | <b>0.309*</b>        |
| ORP                           | <b>-0.389*</b>                  | <b>-0.456*</b>    | -0.189           | -0.123                      | <b>-0.486*</b>    | <b>-0.456*</b> | -0.398               |
| SO <sub>4</sub> <sup>2-</sup> | <b>0.433*</b>                   | 0.359             | 0.113            | -0.045                      | -0.098            | <b>0.589**</b> | 0.667                |
| NH <sub>4</sub> <sup>+</sup>  | 0.017                           | -0.060            | -0.039           | -0.045                      | -0.098            | -0.009         | -0.129               |
| NO <sub>3</sub> <sup>-</sup>  | 0.462                           | 0.336             | 0.332            | <b>0.428*</b>               | <b>0.629**</b>    | -0.359         | <b>0.785**</b>       |
| TIN                           | 0.067                           | -0.022            | -0.005           | 0.003                       | 0.279             | -0.012         | -0.223               |
| TOM                           | <b>0.660**</b>                  | <b>0.524**</b>    | 0.004            | 0.048                       | 0.049             | <b>0.578**</b> | <b>0.346**</b>       |

\*denotes  $p < 0.05$ , \*\*denotes  $p < 0.01$

Table S6 The diversity indices for anaerobic methane oxidation archaea in the samples collected from the simulated columns

| Sample | Sequence number | Coverage (%) | OTUs number | Shannon index | Chao 1 index |
|--------|-----------------|--------------|-------------|---------------|--------------|
| Y1S    | 1622            | 98.5         | 72          | 4.03          | 136.21       |
| Y1Z    | 1401            | 97.3         | 59          | 3.95          | 133.51       |
| Y1X    | 1279            | 98.3         | 47          | 3.23          | 109.17       |
| Y2S    | 1513            | 98.5         | 78          | 5.11          | 172.72       |
| Y2Z    | 1513            | 99.1         | 74          | 5.01          | 169.34       |
| Y2X    | 1298            | 95.8         | 50          | 3.76          | 127.09       |
| Y3S    | 1279            | 94.5         | 52          | 3.45          | 116.61       |
| Y3Z    | 1365            | 95.9         | 58          | 3.77          | 127.43       |
| Y3X    | 1779            | 96.8         | 82          | 5.39          | 182.18       |
| W1S    | 1194            | 99.1         | 49          | 3.02          | 102.08       |
| W1Z    | 1808            | 95.9         | 89          | 5.59          | 188.94       |
| W1X    | 1354            | 96.8         | 51          | 3.09          | 104.44       |
| W2S    | 1304            | 99.3         | 57          | 3.98          | 134.52       |
| W2Z    | 1663            | 100          | 73          | 4.98          | 168.32       |
| W2X    | 1736            | 99.4         | 79          | 4.79          | 161.90       |
| W3S    | 1814            | 97.8         | 84          | 5.34          | 180.49       |
| W3Z    | 1595            | 98.5         | 69          | 4.93          | 166.63       |
| W3X    | 1467            | 94.5         | 58          | 4.12          | 139.26       |
| N1S    | 770             | 93.5         | 39          | 3.15          | 106.47       |
| N1Z    | 1171            | 95.9         | 48          | 4.03          | 136.21       |
| N1X    | 1371            | 98.9         | 54          | 4.47          | 151.09       |
| N2S    | 1266            | 95.8         | 47          | 4.01          | 135.54       |
| N2Z    | 1103            | 96.9         | 44          | 4             | 135.20       |
| N2X    | 1132            | 99.1         | 38          | 3.98          | 134.52       |
| N3S    | 1321            | 93.5         | 49          | 4.07          | 137.57       |
| N3Z    | 1463            | 96.9         | 56          | 4.24          | 143.31       |
| N3X    | 1273            | 99.5         | 55          | 4.22          | 142.64       |

Table S7 Correlation analyses of environmental factors and the diversity indices for anaerobic methane oxidation archaea in the samples collected from the simulated columns

| Environment Factor            | OTUs number    | Shannon index  | Chao 1 index   |
|-------------------------------|----------------|----------------|----------------|
| T                             | 0.200          | 0.305          | 0.305          |
| ORP                           | <b>-0.347*</b> | -0.239         | -0.129         |
| SO <sub>4</sub> <sup>2-</sup> | <b>0.047**</b> | <b>0.192**</b> | <b>0.192**</b> |
| NH <sub>4</sub> <sup>+</sup>  | -0.159         | -0.145         | -0.145         |
| NO <sub>3</sub> <sup>-</sup>  | -0.311         | 0.032          | 0.032          |
| TIN                           | -0.0184        | -0.131         | -0.131         |
| TOM                           | 0.182          | <b>0.449*</b>  | <b>0.449*</b>  |

\*denotes  $p < 0.05$ , \*\*denotes  $p < 0.01$

Table S8 The physiochemical parameters of different intertidal zone sediment samples collected from Zhoushan Archipelago

| Season               | Samples | pH   | ORP<br>(mv) | T<br>(°C) | SO <sub>4</sub> <sup>2-</sup><br>(mg Kg <sup>-1</sup> ) | TP<br>(mg Kg <sup>-1</sup> ) | TN<br>(mg Kg <sup>-1</sup> ) | TOM<br>(g Kg <sup>-1</sup> ) | Salinity<br>(g Kg <sup>-1</sup> ) | Total iron<br>(g Kg <sup>-1</sup> ) | Total Mn<br>(g Kg <sup>-1</sup> ) |
|----------------------|---------|------|-------------|-----------|---------------------------------------------------------|------------------------------|------------------------------|------------------------------|-----------------------------------|-------------------------------------|-----------------------------------|
| Spring<br>(May)      | SpM     | 8.31 | 49.6±6.4    | 20.0      | 119.7                                                   | 411.8                        | 708.3                        | 9.1±1.1                      | 12.9±1.2                          | 36.35                               | 0.77                              |
|                      | SpL     | 8.36 | 48.9±1.5    | 19.9      | 159.6                                                   | 416.8                        | 637.4                        | 9.3±0.6                      | 12.6±0.2                          | 30.66                               | 0.61                              |
|                      | SpS     | 8.37 | 36.4±0.5    | 18.9      | 104.5                                                   | 427.0                        | 530.2                        | 7.2±1.8                      | 10.2±1.4                          | 39.02                               | 0.79                              |
| Summer<br>(August)   | SM      | 8.31 | 87.8±10.9   | 32.0      | 145.2                                                   | 486.0                        | 769.5                        | 14.7±2.7                     | 14.6±0.1                          | 37.40                               | 0.74                              |
|                      | SL      | 8.43 | 34.9±2.2    | 32.0      | 105.2                                                   | 485.8                        | 614.3                        | 9.4±2.4                      | 15.2±0.4                          | 30.75                               | 0.67                              |
|                      | SS      | 8.36 | 26.9±1.4    | 32.0      | 160.6                                                   | 516.5                        | 579.6                        | 8.5±0.6                      | 15.8±0.2                          | 30.61                               | 0.74                              |
| Autumn<br>(November) | AM      | 8.30 | 70.7±2.2    | 22.4      | 165.1                                                   | 520.4                        | 755.8                        | 14.1±1.4                     | 21.0±4.0                          | 40.42                               | 0.90                              |
|                      | AL      | 8.30 | 40.8±5.2    | 20.7      | 122.1                                                   | 441.9                        | 554.6                        | 13.2±0.1                     | 17.5±1.5                          | 33.90                               | 0.74                              |
|                      | AS      | 8.30 | 61.7±2.2    | 20.0      | 125.9                                                   | 591.2                        | 453.3                        | 13.7±2.9                     | 19.9±0.2                          | 38.78                               | 1.00                              |
| Winter<br>(February) | WM      | 8.12 | 72.4±3.8    | 9.0       | 129.9                                                   | 527.3                        | 697.5                        | 24.6±0.6                     | 14.3±1.5                          | 37.09                               | 0.81                              |
|                      | WL      | 8.24 | 62.8±7.1    | 9.0       | 132.8                                                   | 517.6                        | 521.6                        | 13.8±1.0                     | 13.5±1.2                          | 40.08                               | 0.79                              |
|                      | WS      | 8.12 | 53.5±8.0    | 9.0       | 150.9                                                   | 558.8                        | 461.3                        | 18.8±2.9                     | 13.2±1.5                          | 34.34                               | 0.69                              |

*ORP*: Oxidation-Reduction Potential; *T*: Temperature;

*TP*: Total Phosphorus; *TN*: Total Nitrogen; *TOM*: Total Organic Matter.

Table S9 Physicochemical properties of the samples collected from the simulated columns

| Samples | pH   | ORP<br>(mv) | T<br>(°C) | NH <sub>4</sub> <sup>+</sup> -N<br>(mg/Kg) | NO <sub>3</sub> <sup>-</sup> -N<br>(mg/Kg) | TIN<br>(mg/Kg) | SO <sub>4</sub> <sup>2-</sup><br>(mg/Kg) | TOM<br>(g/Kg) |
|---------|------|-------------|-----------|--------------------------------------------|--------------------------------------------|----------------|------------------------------------------|---------------|
| Y1S     | 7.93 | 85.1        | 20.6      | 4.14                                       | 4.50                                       | 8.79           | 314.96                                   | 17.83         |
| Y1Z     | 8.00 | 95.6        | 21.2      | 3.75                                       | 5.03                                       | 8.90           | 321.86                                   | 18.85         |
| Y1X     | 7.89 | 76.4        | 20.7      | 23.10                                      | 3.91                                       | 27.09          | 294.51                                   | 22.85         |
| Y2S     | 8.02 | 123.1       | 25.6      | 4.85                                       | 4.93                                       | 10.07          | 326.39                                   | 32.22         |
| Y2Z     | 7.97 | 105.7       | 24.9      | 4.13                                       | 4.48                                       | 8.68           | 345.90                                   | 36.22         |
| Y2X     | 8.00 | 88.7        | 25        | 5.43                                       | 5.42                                       | 11.00          | 310.55                                   | 30.76         |
| Y3S     | 7.83 | 133.1       | 32.5      | 4.42                                       | 3.42                                       | 8.14           | 365.72                                   | 25.67         |
| Y3Z     | 8.00 | 107.5       | 33.6      | 7.60                                       | 4.32                                       | 12.23          | 387.20                                   | 28.00         |
| Y3X     | 7.99 | 78.7        | 31.7      | 12.04                                      | 3.69                                       | 16.04          | 358.47                                   | 27.66         |
| W1S     | 8.08 | 75.6        | 20.9      | 12.31                                      | 4.61                                       | 17.03          | 282.95                                   | 16.17         |
| W1Z     | 8.15 | 96.4        | 21.5      | 26.51                                      | 4.84                                       | 31.46          | 222.67                                   | 19.99         |
| W1X     | 7.79 | 71.7        | 19.9      | 34.79                                      | 4.79                                       | 39.67          | 205.22                                   | 11.80         |
| W2S     | 8.09 | 83.7        | 25.3      | 3.65                                       | 5.38                                       | 9.14           | 284.58                                   | 29.30         |
| W2Z     | 8.04 | 109.6       | 26.8      | 7.53                                       | 5.71                                       | 13.38          | 295.18                                   | 28.61         |
| W2X     | 7.89 | 100.8       | 25.1      | 22.37                                      | 6.39                                       | 28.85          | 287.92                                   | 34.28         |
| W3S     | 8.03 | 93.7        | 32.9      | 4.40                                       | 4.33                                       | 9.13           | 481.00                                   | 29.09         |
| W3Z     | 8.12 | 87.6        | 33.4      | 9.99                                       | 5.39                                       | 15.74          | 391.94                                   | 30.70         |
| W3X     | 7.99 | 78.5        | 31.8      | 16.76                                      | 5.18                                       | 22.25          | 316.72                                   | 34.97         |
| N1S     | 8.02 | 69.5        | 19.7      | 10.91                                      | 5.20                                       | 16.16          | 238.67                                   | 21.96         |
| N1Z     | 8.00 | 83.5        | 20.6      | 19.15                                      | 5.87                                       | 25.08          | 238.85                                   | 23.84         |
| N1X     | 7.89 | 65.3        | 19.6      | 19.03                                      | 5.69                                       | 26.10          | 153.13                                   | 23.71         |
| N2S     | 8.01 | 67.4        | 25.9      | 11.10                                      | 6.74                                       | 17.89          | 385.43                                   | 25.50         |
| N2Z     | 8.09 | 70.7        | 24.8      | 21.71                                      | 6.12                                       | 27.89          | 335.30                                   | 27.83         |
| N2X     | 8.12 | 59.2        | 23.9      | 19.71                                      | 6.72                                       | 26.48          | 441.72                                   | 29.39         |
| N3S     | 7.79 | 57.4        | 33        | 7.39                                       | 5.21                                       | 12.96          | 423.50                                   | 31.27         |
| N3Z     | 8.00 | 60.5        | 34        | 8.12                                       | 5.33                                       | 13.82          | 426.94                                   | 33.15         |
| N3X     | 8.04 | 55.3        | 35        | 8.32                                       | 5.51                                       | 14.28          | 424.30                                   | 36.46         |

*ORP*: Oxidation-Reduction Potential; *T*: Temperature;

*TIN*: Total Inorganic Nitrogen; *TOM*: Total Organic Material

Table S10 The different treatments in experiment groups to detect potential methane oxidation rates

| Groups | Treatments                               |                                        |                                        |                           |                                     |                                   |                   |
|--------|------------------------------------------|----------------------------------------|----------------------------------------|---------------------------|-------------------------------------|-----------------------------------|-------------------|
|        | <sup>13</sup> CH <sub>4</sub><br>10% v/v | NO <sub>3</sub> <sup>-</sup><br>0.1 mM | SO <sub>4</sub> <sup>2-</sup><br>10 mM | O <sub>2</sub><br>10% v/v | Ferrihydrite<br>1 g L <sup>-1</sup> | Birnessite<br>1 g L <sup>-1</sup> | BaCl <sub>2</sub> |
| A      | +                                        |                                        |                                        |                           |                                     |                                   | +                 |
| B      | +                                        | +                                      |                                        |                           |                                     |                                   | +                 |
| C      | +                                        |                                        | +                                      |                           |                                     |                                   | +                 |
| D      | +                                        |                                        |                                        | +                         |                                     |                                   | +                 |
| E      | +                                        |                                        |                                        |                           | +                                   |                                   | +                 |
| F      | +                                        |                                        |                                        |                           |                                     | +                                 | +                 |

+ denotes that add different substrates in responding group

Group A was used to determine whether the preculture process had depleted the residual NO<sub>x</sub><sup>-</sup>, O<sub>2</sub> and other electron accepters, and it was also set as control. Group B was supplemented with deoxygenated NO<sub>3</sub><sup>-</sup> solution and the final NO<sub>3</sub><sup>-</sup> concentration was controlled at 0.1 mmol L<sup>-1</sup>. Group C was replenished with deoxygenated SO<sub>4</sub><sup>2-</sup> solution and the final concentration was set at 10 mmol L<sup>-1</sup> (approximate to the sulfate concentration in sediments collected from Zhoushan Archipelago intertidal zone). Group D was added with 10% volume O<sub>2</sub> in the gas phase. Ferrihydrite and birnessite were added to Group E and F respectively with the final concentration controlled at 0.1 g L<sup>-1</sup>. 3 mL of <sup>13</sup>CH<sub>4</sub> was used to replace the equivoluminal gas in all serum bottles and accounted for about 10% of the gas volume. The methane oxidation rate could be calculated by the following formulae: r(D-AOM) = Group B - Group A, r(S-AOM) = Group C - Group A, r(aerobic methane oxidation) = Group D - Group A, r(iron-AOM) = Group E - Group A, r(manganese-AOM) = Group F - Group A.
